# Supplementary material for: Tunable hydrodynamic characteristics in microchannels with biomimetic superhydrophobic (lotus leaf replica) walls
Source: Royal Society of Chemistry journal article supplement (doi:10.1039/c4sm00037d), 2014-01-01
Supplement: c4sm00037d1.pdf [file c4sm00037d1.pdf]

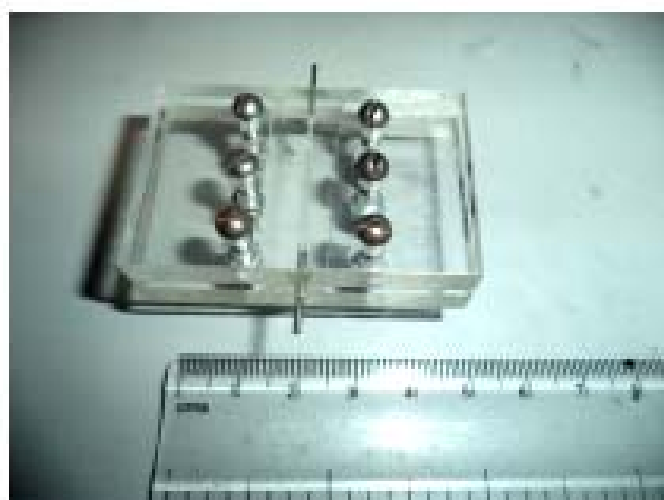

**Fig. S1** The robust, leak-proof microfluidic device created by mechanically integrating the PDMS lotus leaf replica with the PMMA microchannel.

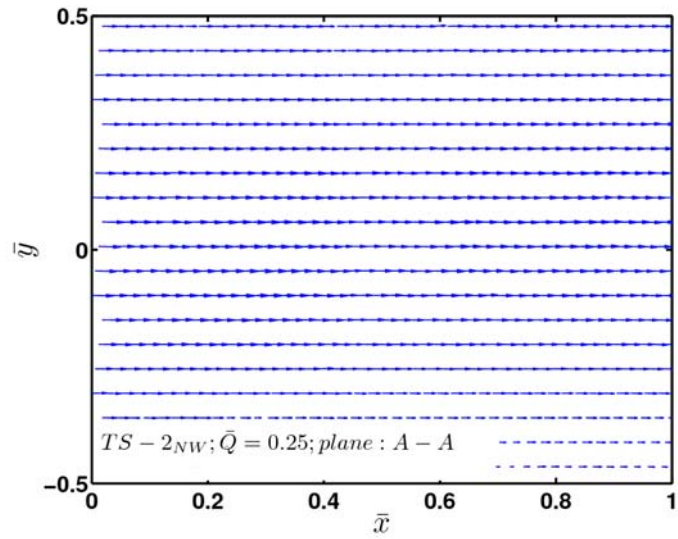

(a)

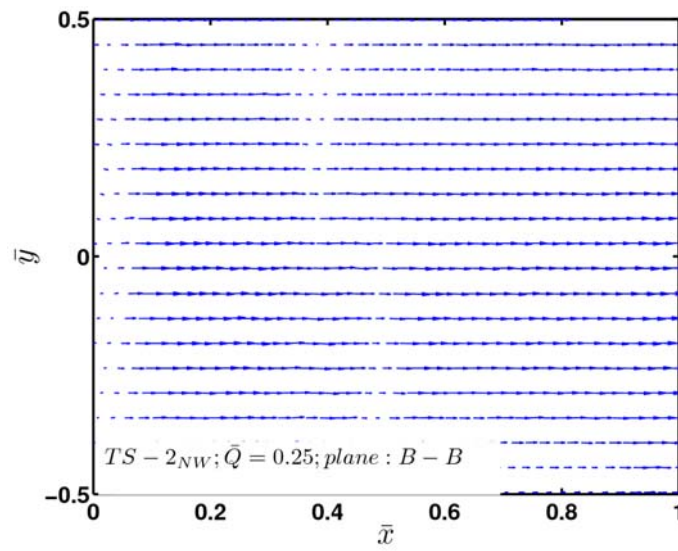

(b)

**Fig. S2** The velocity vector field for the flow through  $TS-2_{NW}$ , corresponding to  $\bar{Q} = 0.25$ , (a) at the plane  $A-A$ , (b) at the plane  $B-B$ . These velocity vector fields clearly prove that the at  $\bar{Q} = 0.25$ , while the flow through  $TS-2_{BW}$  is completely erratic (see Fig. 7 (IIIb)); the flow through  $TS-2_{NW}$  remains laminar and uni-axial.
